# Supplementary material for: NaCl cotransporter abundance in urinary vesicles is increased by calcineurin inhibitors and predicts thiazide sensitivity
Source: PLoS One. 2017 Apr 21;12(4):e0176220. doi: 10.1371/journal.pone.0176220 (PMC5400280; doi:10.1371/journal.pone.0176220)
Supplement: S1 Excel — Both the dimeric and monomeric forms of the tNCC and pNCC bands on the blots were quantified together with Image Studio Lite software (LI-COR Biosciences, NE, USA). (XLSX) [file pone.0176220.s001.xlsx]

## Sheet: Final to use
Densitometry Analysis of Group 1
Semi quantification of immunoblots of of tNCC and pNCC abundance in uEVs of kidney transplant recipients treated with CsA, Tac or CNI-free immunosuppressive regimens and healthy volunteers. Densitometry was performed usingImage Studio Lite software (LI-COR Biosciences, NE, USA).
uEV samples with a mark of # in Figs. S1 and S2 (red marked in this excel) were loaded twice as a control on the gel, although these samples were excluded from analysis in Graphpad Prism 5 software (GraphPad Software Inc, La Jolla, CA, USA)
Gender	CsA	CNI-free	Tac	Healthy volunteers
Males	5	7	12	7	Males are marked in organge
Females	4	6	11	0	Females are marked in blue
tNCC
	Raw OD of both tNCC dimer & monomer combined					Both tNCC dimer & monomer combined/average OD CNI-free						Raw OD of CD9					OD CD9/average OD CNI-free					tNCC/CD9 (normalised to CD9)
Manuscript Fig. 1A	CsA	CNI-free	Tac	Healthy Volunteers		CsA	CNI-free	Tac	Healthy Volunteers			CsA	CNI-free	Tac	Healthy Volunteers		CsA	CNI-free	Tac	Healthy Volunteers		CsA	CNI-free	Tac	Healthy Volunteers
	15906558	900873	3553847	1679120		9.42899	0.534014	2.10663	0.995339			4.99755e+06	3154752	2209396	2341775		0.791455	0.499613	0.349899	0.370863		11.9135	1.06885	6.02068	2.68384
	6398900	2901368	11015541	1129336		3.7931	1.71986	6.52973	0.669441			4514316	1.8985e+06	2326010	1.56781e+06		0.714925	0.300662	0.368367	0.248291		5.30559	5.72022	17.7262	2.6962
	2625516	1258710	8490659	4016807		1.55634	0.746131	5.03304	2.38106			5686696	13889912	7931658	12618742		0.900593	2.19972	1.25612	1.99841		1.72812	0.339193	4.0068	1.19148
	3895083		9330957	5575459		2.3089		5.53115	3.30499			3.23677e+06		5704596	1252306		0.512602		0.903428	0.198326		4.50428		6.1224	16.6644
			3137304	1769590				1.85971	1.04897					5.12577e+06	2.55439e+06				0.81176	0.404536				2.29096	2.59302
Average OD		1.68698e+06									Average OD		6.31439e+06
Supplemental Fig. S1A	CsA	CNI-free	Tac			CsA	CNI-free	Tac				CsA	CNI-free	Tac			CsA	CNI-free	Tac			CsA	CNI-free	Tac
	29117901	3511284	12001792			6.64699	0.80155	2.73975				153750	490465	370099			0.467705	1.49199	1.12584			14.2119	0.537237	2.43353
	23494515	6417682	36534665			5.36329	1.46502	8.34007				264808	385032	145378			0.805542	1.17126	0.442239			6.65799	1.2508	18.8587
	22115123	2096669	17877897			5.0484	0.478624	4.08114				202054	179720	565200			0.614645	0.546707	1.71933			8.21353	0.875468	2.37368
	36765709	5496830	5636155			8.39282	1.25481	1.28661				487710	259714	174981			1.48361	0.790046	0.532289			5.65704	1.58827	2.41713
			23662825					5.40171						330166					1.00436					5.37826
Average OD		4.38062e+06									Average OD		328733
Supplemental Fig. S1B		CNI-free	Tac				CNI-free	Tac					CNI-free	Tac				CNI-free	Tac				CNI-free	Tac
		361623	1869472				0.445301	2.30206					309618	121351				1.02439	0.401497				0.434699	5.7337
		735439	1108305				0.905617	1.36476					443726	332326				1.46809	1.09952				0.616866	1.24124
		713608	2319500				0.878735	2.85623					399636	285242				1.32222	0.943741				0.664592	3.02649
		1253543	3760796				1.54361	4.63103					56006	303970				0.185299	1.0057				8.33037	4.60478
		996216	2491432				1.22674	3.06794					290098	94925				0.959806	0.314065				1.27811	9.7685
			1406417					1.73186						132046					0.436882					3.96413
Average OD		812086									Average OD		302246
Supplemental Fig. S1C	CsA	CNI-free	Tac			CsA	CNI-free	Tac				CsA	CNI-free	Tac			CsA	CNI-free	Tac			CsA	CNI-free	Tac
	1.7262e+06	182728	703389			8.07883	0.85519	3.29195				430338	502287	422753			1.16561	1.36049	1.14506			6.93099	0.62859	2.8749
	1644114	168702	890977			7.69466	0.789546	4.16988				442126	236105	409006			1.19754	0.639511	1.10783			6.4254	1.23461	3.76401
		183686	788962				0.859673	3.69244					182998	431846				0.495666	1.16969				1.73438	3.15676
		319562	421674				1.49559	1.97349					308371	260351				0.83525	0.705184				1.79059	2.79854
			1219472					5.70728						78348.5					0.212214					26.894
			1377755					6.44807						555976					1.50591					4.28184
Average OD		213670									Average OD		369196
Supplemental Fig. S1D	CsA	CNI-free	Tac	Healthy Volunteers		CsA	CNI-free	Tac	Healthy Volunteers			CsA	CNI-free	Tac	Healthy Volunteers		CsA	CNI-free	Tac	Healthy Volunteers		CsA	CNI-free	Tac	Healthy Volunteers
	2021690	167993	1.2096e+06	190836		12.3377	1.0252	7.3818	1.16461			5852896	2276535	11974526	3402327		0.800273	0.311273	1.63729	0.465204		15.4168	3.29358	4.50854	2.50343
	1.02776e+06	159733	1263027	100393		6.27205	0.974796	7.70782	0.612664			5576643	12350712	2870567	2709218		0.762501	1.68873	0.392496	0.370434		8.22564	0.577237	19.638	1.65391
Average OD		163863									Average OD		7.31362e+06
pNCC
	Raw OD of both pNCC dimer & monomer combined					Both pNCC dimer & monomer combined/average OD CNI-free						Raw OD of CD9					OD CD9/average OD CNI-free					pNCC/CD9 (normalised to CD9)
Manuscript Fig. 1B	CsA	CNI-free	Tac	Healthy Volunteers		CsA	CNI-free	Tac	Healthy Volunteers			CsA	CNI-free	Tac	Healthy Volunteers		CsA	CNI-free	Tac	Healthy Volunteers		CsA	CNI-free	Tac	Healthy Volunteers
	2431305	401848	1339636	440923		8.3602	1.38178	4.60643	1.51614			3457788	2140984	2042112	2588520		0.787789	0.487781	0.465255	0.589744		10.6122	2.83279	9.90086	2.57085
	905234	210215	1991944	36025		3.11271	0.722838	6.84943	0.123874			4117972	1410312	2616952	1675770		0.938199	0.321312	0.596221	0.381791		3.31774	2.24965	11.4881	0.324455
	391188	260394	1225117	553383		1.34513	0.895382	4.21264	1.90284			4889784	9616392	6338128	11114184		1.11404	2.19091	1.44402	2.53215		1.20743	0.408681	2.91731	0.751474
	1479584		1912262	910796		5.08765		6.57544	3.13183			2959392		4983496	1507032		0.67424		1.13539	0.343348		7.54575		5.79134	9.12146
			474041	483475				1.63002	1.66246					3413824	2366649				0.777773	0.539195				2.09575	3.08323
Average OD		290819									Average OD		4.38923e+06
Supplemental Fig. S2A	CsA	CNI-free	Tac	Healthy Volunteers		CsA	CNI-free	Tac	Healthy Volunteers			CsA	CNI-free	Tac	Healthy Volunteers		CsA	CNI-free	Tac	Healthy Volunteers		CsA	CNI-free	Tac	Healthy Volunteers
	790275	316023	1920263	873234		1.95774	0.782879	4.75704	2.16325			70365	50746	18606	6226		1.48505	1.07099	0.392678	0.131399		1.3183	0.730986	12.1143	16.4632
	1618410	504101	2173619	96597		4.00926	1.2488	5.38467	0.239298			11776	73545	49710	5549		0.248531	1.55216	1.04913	0.117111		16.1318	0.804556	5.13253	2.04334
	911582	390880	1130750	781392		2.25825	0.968321	2.80119	1.93573			24497	17856	8750	32184		0.517007	0.376849	0.184668	0.679241		4.36792	2.56952	15.1688	2.84984
			2305674	496249				5.71181	1.22935					14910	10332				0.314674	0.218056				18.1515	5.63777
			1759789	1370582				4.3595	3.39532					6222	5622				0.131315	0.118652				33.1988	28.6158
Average OD		403668									Average OD		47382.3
Supplemental Fig. S2B	CsA	CNI-free	Tac			CsA	CNI-free	Tac				CsA	CNI-free	Tac			CsA	CNI-free	Tac			CsA	CNI-free	Tac
	60953647	4493278	14085420			24.2226	1.7856	5.59746				394888	679736	169910			0.718144	1.23617	0.308999			33.7295	1.44446	18.1149
	5699135	716150	14597883			2.2648	0.284594	5.80111				253245	420010	115790			0.460552	0.763831	0.210576			4.91759	0.372588	27.5488
	34970187	811091	20833201			13.897	0.322323	8.27899				798408	359542	534712			1.45199	0.653864	0.972428			9.57099	0.492951	8.51373
	22456067	4045052	31920211			8.92391	1.60748	12.6849				237328	187111	505987			0.431605	0.34028	0.920189			20.6761	4.72399	13.7851
			8175528					3.24891						378356					0.688079					4.72171
			7551285					3.00084						331346					0.602586					4.97993
Average OD		2.51639e+06									Average OD		549873
Supplemental Fig. S2C		CNI-free	Tac				CNI-free	Tac					CNI-free	Tac				CNI-free	Tac				CNI-free	Tac
		197425	2080444				0.27393	2.88665					5303794	6574080				0.523056	0.648331				0.52371	4.45243
		541028	1023166				0.750684	1.41966					6269796	7086600				0.618323	0.698875				1.21407	2.03135
		884623	1665970				1.22743	2.31156					14746486	23462162				1.45429	2.31382				0.844006	0.999022
		1373143	3039344				1.90526	4.21713					9178742	28783864				0.905201	2.83864				2.10479	1.48562
		607348	1797549				0.842704	2.49412					15201222	19698940				1.49913	1.94269				0.562127	1.28385
			1035575					1.43687						9632902					0.94999					1.51252
			1040598					1.44384						5055214					0.498541					2.89614
Average OD		720713									Average OD		10140008
					pNCC/tNCC
						Ratio of pNCC to tNCC
					#	CsA	CNI-free	Tac	Healthy Volunteers
					1	0.886648	2.58754	2.18663	1.52324
					2	0.820623	0.42029	1.04896	0.185041
					3	0.864289	1.20003	0.836998	0.799159
					4	2.20349	0.976705	1.1888	0.947608
					5	0.29453	0.852413	0.876491	1.58485
					6	0.747537	2.02313	1.7363	2.00656
					7	0.447319	1.42301	0.645638
					8	1.65581	0.639104	0.686374
					9	1.10461	0.302479	4.43942
					10		0.854278	0.807058
					11		0.795167	2.4315
					12		2.22787	4.25064
					13		1.06733	2.89858
					14			2.73911
					15			1.05899
					16			1.73273
					17			0.87688
					18			0.340455
					19			0.626024
					20			2.13689
					21			0.437007
					22			0.222838
					23			0.195595
