# Supplementary material for: NaCl cotransporter abundance in urinary vesicles is increased by calcineurin inhibitors and predicts thiazide sensitivity
Source: PLoS One. 2017 Apr 21;12(4):e0176220. doi: 10.1371/journal.pone.0176220 (PMC5400280; doi:10.1371/journal.pone.0176220)
Supplement: S2 Excel — tNCC and pNCC bands on the blots were quantified with Image Studio Lite software (LI-COR Biosciences, NE, USA). (XLSX) [file pone.0176220.s002.xlsx]

## Sheet: Sheet1
Densitometry Analysis of Mice Study
Semi quantification of immunoblots of all the tNCC and pNCC abundance in mouse cortical tubule suspension exposed to CsA for 30 or 90 min. Densitometry was performed usingImage Studio Lite software (LI-COR Biosciences, NE, USA).
Manuscript Fig. 5A	30 min exposed to CsA								90 min exposed to CsA
	No CsA		5 uM		10 uM		20 uM		No CsA			5 uM			10 uM			20 uM			No CsA		Hypo low Cl-
pNCC	62944	41368	52075	51247	72751	80100	74430	101621	101829	98095	103206	143102	178419	165472	127949	144584	148525	205882	178922	194658	40200	43121	168616	178577
tNCC	105367	96129	101528	106809	117631	118736	114762	121722	54011	52982	57685	54091	61519	52362	50346	57573	56592	54603	58018	69329	75125	85538	79043	56274
Average pNCC No CsA	52156								101043												41660.5
Average tNCC No CsA	100748								54892.7												80331.5
pNCC/average pNCC no CsA	1.20684	0.793159	0.998447	0.982572	1.39487	1.53578	1.42706	1.9484	1.00778	0.970821	1.0214	1.41624	1.76577	1.63763	1.26628	1.43091	1.46991	2.03756	1.77075	1.92648	0.964943	1.03506	4.04738	4.28648
tNCC/average tNCC no CsA	1.04585	0.954153	1.00774	1.06016	1.16758	1.17854	1.1391	1.20818	0.983938	0.965193	1.05087	0.985396	1.12071	0.953898	0.917172	1.04883	1.03096	0.994723	1.05694	1.26299	0.935187	1.06481	0.98396	0.700522
pNCC/tNCC	1.15394	0.83127	0.990776	0.926814	1.19467	1.30311	1.2528	1.61267	1.02423	1.00583	0.971961	1.43723	1.57557	1.71678	1.38063	1.36429	1.42578	2.04837	1.67536	1.52533	1.03182	0.972056	4.11336	6.11898
Supplemental Fig. 8A	30 min exposed to CsA
	No CsA			5 uM			10 uM			20 uM			No CsA		Hypo low Cl-
pNCC	55788	51281	43579	74742	87956	85640	73695	66885	92221	45743	73502	95345	114502	91593	136316	189498
tNCC	182486	170557	151145	149215	161306	150595	149583	148529	157622	141107	134430	123996	151429	145087	142565	139663
Average pNCC No CsA	50216												103048
Average tNCC No CsA	168063												148258
pNCC/average pNCC no CsA	1.11096	1.02121	0.867831	1.48841	1.75155	1.70543	1.46756	1.33195	1.83649	0.910925	1.46372	1.8987	1.11116	0.888843	1.32285	1.83894
tNCC/average tNCC no CsA	1.08582	1.01484	0.899337	0.887853	0.959797	0.896065	0.890043	0.883772	0.937876	0.839609	0.79988	0.737796	1.02139	0.978615	0.961603	0.942028
pNCC/tNCC	1.02315	1.00627	0.964967	1.67641	1.82492	1.90325	1.64886	1.50712	1.95813	1.08494	1.82992	2.57347	1.08789	0.908266	1.37567	1.9521
Supplemental Fig. 8B	30 min exposed to CsA
	No CsA			5 uM			10 uM			20 uM
pNCC	9572	5949	7769	7901	7504	6463	7550	15718	9417	20485	14254	16834
tNCC	31885	22888	26704	34639	24875	23955	23902	19478	22171	23977	20082	22154
Average pNCC No CsA	7763.33
Average tNCC No CsA	27159
pNCC/average pNCC no CsA	1.23298	0.766295	1.00073	1.01773	0.966595	0.832503	0.97252	2.02465	1.21301	2.63869	1.83607	2.1684
tNCC/average tNCC no CsA	1.17401	0.842741	0.983247	1.27542	0.915903	0.882028	0.880077	0.717184	0.816341	0.882838	0.739423	0.815715
pNCC/tNCC	1.05022	0.909288	1.01778	0.797962	1.05535	0.943851	1.10504	2.82305	1.48591	2.98887	2.48311	2.65828
Supplemental Fig. 8C	30 min exposed to CsA					90 min exposed to CsA
	No CsA	Hypo low Cl-	No CsA	5 uM	10 uM	No CsA	5 uM	10 uM
pNCC	192872	346483	59899	79998	118946	62043	65811	108014
tNCC	380838	350307	278187	444252	378425	563000	549310	597971
pNCC	1	1.79644	1	1.33555	1.98578	1	1.06073	1.74095
tNCC	1	0.919832	1	1.59695	1.36033	1	0.975684	1.06212
pNCC/tNCC	1	1.95301	1	0.836309	1.45978	1	1.08717	1.63914
Supplemental Fig. 8D	90 min exposed to CsA									10 min
	No CsA		5 uM		10 uM		20 uM		Hypo low Cl-	No CsA		Hypo low Cl-
pNCC	33083	49090	49061	64843	38475	71924	91614	101291	88604	46609	18647	78858	87345
tNCC	122957	142267	118070	114639	65021	112155	139094	113010	115168	89448	64577	86629	117904
Average pNCC No CsA	41086.5									32628
Average tNCC No CsA	132612									77012.5
pNCC/average pNCC no CsA	0.805204	1.1948	1.19409	1.57821	0.936439	1.75055	2.22978	2.46531	2.15652	1.4285	0.571503	2.41688	2.677
tNCC/average tNCC no CsA	0.927194	1.07281	0.890342	0.864469	0.49031	0.845738	1.04888	0.852185	0.868458	1.16147	0.838526	1.12487	1.53097
pNCC/tNCC	0.868431	1.11371	1.34116	1.82564	1.90989	2.06985	2.12587	2.89293	2.48316	1.2299	0.681557	2.14859	1.74856
Supplemental Fig. 8E	90 min exposed to CsA
	No CsA			5 uM			10 uM			20 uM
pNCC	15378	15063	21010	44292	44486	31130	42827	30118	44437	67634	40597	64752
tNCC	166731	175852	166834	168128	173317	174775	175274	170913	198365	178865	186917	165639
Average pNCC No CsA	17150.3
Average tNCC No CsA	169806
pNCC/average pNCC no CsA	0.896659	0.878292	1.22505	2.58257	2.59389	1.81513	2.49715	1.75612	2.59103	3.9436	2.36713	3.77555
tNCC/average tNCC no CsA	0.981893	1.03561	0.9825	0.99012	1.02068	1.02926	1.0322	1.00652	1.16819	1.05335	1.10077	0.975462
pNCC/tNCC	0.913194	0.848094	1.24687	2.60834	2.54133	1.76352	2.41924	1.74474	2.21799	3.74386	2.15043	3.87053
Supplemental Fig. 8F	90 min exposed to CsA
	No CsA			5 uM			10 uM			20 uM
pNCC	9500	7546	13545	20410	21956	25196	13281	15749	21429	24423	56269	34801
tNCC	17265	24071	24157	28354	31877	18236	20157	18128	19681	21614	23752	22808
Average pNCC No CsA	10197
Average tNCC No CsA	21831
pNCC/average pNCC no CsA	0.931647	0.740022	1.32833	2.00157	2.15318	2.47092	1.30244	1.54447	2.1015	2.39512	5.51819	3.41287
tNCC/average tNCC no CsA	0.790848	1.10261	1.10655	1.2988	1.46017	0.835326	0.92332	0.830379	0.901516	0.99006	1.08799	1.04475
pNCC/tNCC	1.17804	0.671157	1.20043	1.5411	1.47461	2.95803	1.41061	1.85996	2.33107	2.41916	5.07189	3.26667
